# Supplementary material for: Novel Prognosis and Therapeutic Response Model of Immune-Related lncRNA Pairs in Clear Cell Renal Cell Carcinoma
Source: MDPI journal article supplement (doi:10.3390/vaccines10071161), 2022-07-21
Supplement: s1 [file s1]

## **Supplemental Information:**

**Novel Prognosis and Therapeutic response model of Immune-related lncRNA pairs in Clear Cell Renal Cell**

**Carcinoma**

Gang Wang<sup>1</sup>, Panhong Liu<sup>2</sup>, Jiangfeng Li<sup>1</sup>, Ke Jin<sup>1</sup>, Xiangyi Zheng<sup>1</sup>, Liping Xie<sup>1</sup>

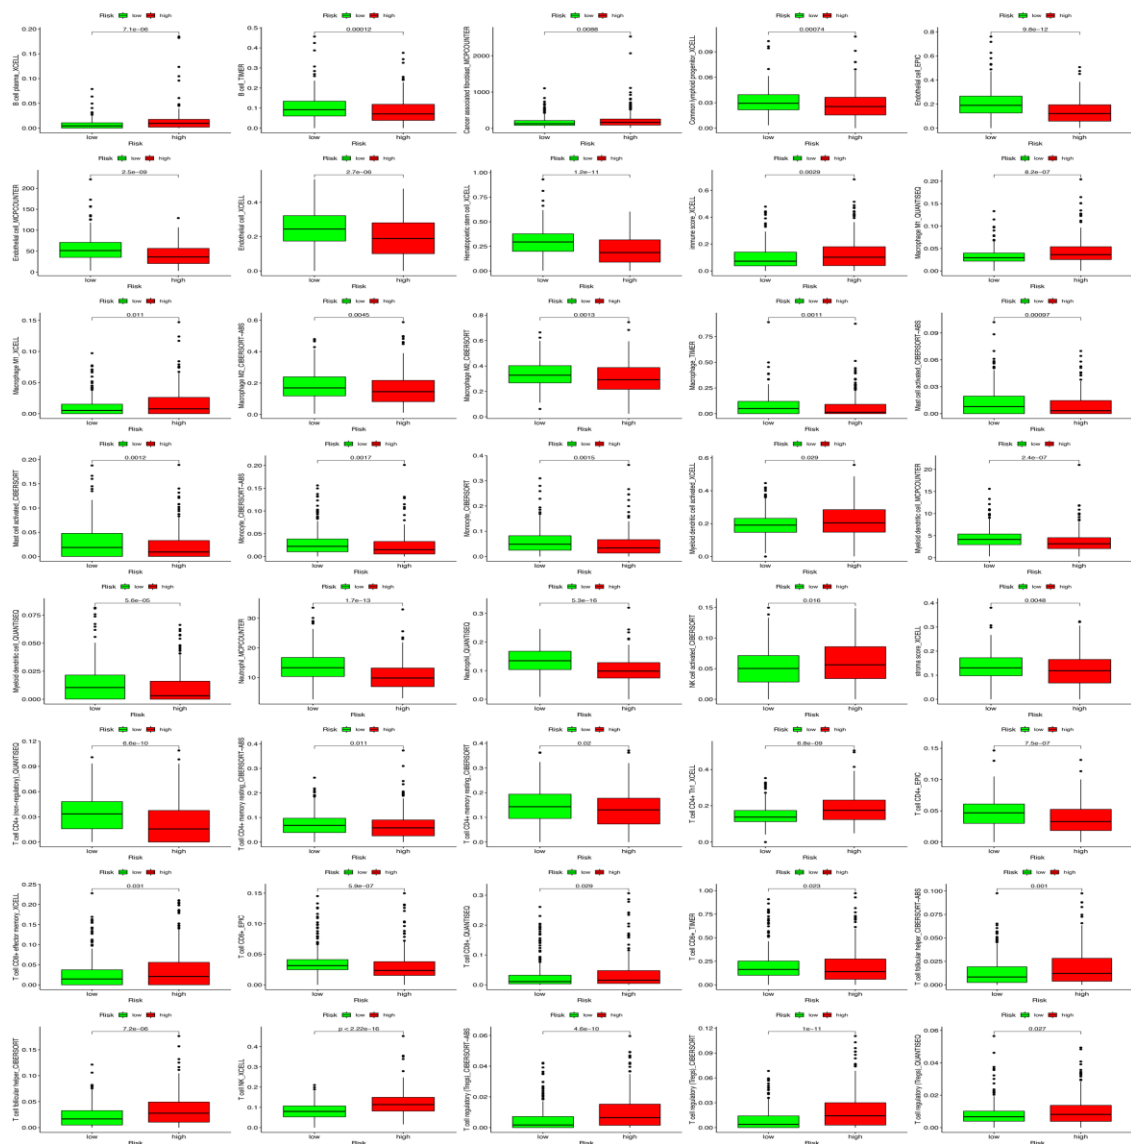

Figure S1. The representative results of the evaluation of tumor infiltrating immune cells with risk assessment model.

Table S1: Univariable and multivariable Cox regression analyses in KIRC.

| Characteristics | Univariate analysis |                 |         | Multivariate analysis |                 |         |
|-----------------|---------------------|-----------------|---------|-----------------------|-----------------|---------|
|                 | HR                  | 95% CI          | pvalue  | HR                    | 95% CI          | pvalue  |
| Age             | 1.02926             | 1.01582-1.04287 | 0.00002 | 1.02803               | 1.01312-1.04316 | 0.00021 |
| Gender          | 0.95679             | 0.69889-1.30986 | 0.78284 | 1.16609               | 0.83965-1.61943 | 0.35916 |
| Grade           | 2.28613             | 1.86217-2.80660 | 0.00000 | 1.27487               | 1.00643-1.61489 | 0.04410 |
| Stage           | 1.89681             | 1.65995-2.16747 | 0.00000 | 1.50680               | 1.29129-1.75829 | 0.00000 |
| riskScore       | 1.27745             | 1.23578-1.32052 | 0.00000 | 1.20467               | 1.15751-1.25376 | 0.00000 |

In both univariable and multivariable Cox regression analyses, age, gender, grade, stage and riskScore, Expression were evaluated as continuous variables.  $P < 0.05$  was considered statistically significant in all analyses.

Table S2: The detail comparison results of correlation ship between tumour infiltrating immune cells and risk sore.

| Immune cells  | Type      | Correlation | p-value    |
|---------------|-----------|-------------|------------|
| B cell        | TIMER     | -0.1589881  | 0.00025125 |
| Macrophage    | TIMER     | -0.1321237  | 0.00239478 |
| B cell naive  | CIBERSORT | -0.1729378  | 6.69E-05   |
| B cell memory | CIBERSORT | 0.20900677  | 1.33E-06   |

|                              |               |            |            |
|------------------------------|---------------|------------|------------|
| B cell plasma                | CIBERSORT     | -0.1018875 | 0.01942441 |
| T cell CD8+                  | CIBERSORT     | 0.10741859 | 0.01370566 |
| T cell CD4+ memory resting   | CIBERSORT     | -0.1501841 | 0.00054856 |
| T cell CD4+ memory activated | CIBERSORT     | 0.1301107  | 0.00279281 |
| T cell follicular helper     | CIBERSORT     | 0.28179604 | 4.66E-11   |
| T cell regulatory (Tregs)    | CIBERSORT     | 0.34056042 | 9.48E-16   |
| NK cell activated            | CIBERSORT     | 0.10593058 | 0.01507605 |
| Monocyte                     | CIBERSORT     | -0.1548498 | 0.00036454 |
| Macrophage M0                | CIBERSORT     | 0.16128406 | 0.00020357 |
| Macrophage M2                | CIBERSORT     | -0.1365467 | 0.00169572 |
| Mast cell activated          | CIBERSORT     | -0.206036  | 1.89E-06   |
| B cell naive                 | CIBERSORT-ABS | -0.1566614 | 0.00031008 |
| B cell memory                | CIBERSORT-ABS | 0.20579494 | 1.94E-06   |
| B cell plasma                | CIBERSORT-ABS | -0.0957489 | 0.02810671 |
| T cell CD4+ memory resting   | CIBERSORT-ABS | -0.1222734 | 0.00498233 |
| T cell CD4+ memory activated | CIBERSORT-ABS | 0.13002696 | 0.00281061 |
| T cell follicular helper     | CIBERSORT-ABS | 0.22890281 | 1.11E-07   |
| T cell regulatory (Tregs)    | CIBERSORT-ABS | 0.32749205 | 1.29E-14   |
| NK cell activated            | CIBERSORT-ABS | 0.08937723 | 0.04045578 |

|                                  |               |            |            |
|----------------------------------|---------------|------------|------------|
| Monocyte                         | CIBERSORT-ABS | -0.1343951 | 0.0020083  |
| Macrophage M0                    | CIBERSORT-ABS | 0.16169439 | 0.000196   |
| Macrophage M2                    | CIBERSORT-ABS | -0.0933823 | 0.03225153 |
| Mast cell activated              | CIBERSORT-ABS | -0.2089517 | 1.34E-06   |
| Macrophage M1                    | QUANTISEQ     | 0.28154893 | 4.85E-11   |
| Monocyte                         | QUANTISEQ     | 0.19805701 | 4.72E-06   |
| Neutrophil                       | QUANTISEQ     | -0.4234731 | 2.65E-24   |
| T cell CD4+ (non-regulatory)     | QUANTISEQ     | -0.3019058 | 1.51E-12   |
| T cell CD8+                      | QUANTISEQ     | 0.16776862 | 0.00011063 |
| T cell regulatory (Tregs)        | QUANTISEQ     | 0.09631144 | 0.0271917  |
| Myeloid dendritic cell           | QUANTISEQ     | -0.2086886 | 1.38E-06   |
| uncharacterized cell             | QUANTISEQ     | 0.15391113 | 0.00039615 |
| Myeloid dendritic cell           | MCPCOUNTER    | -0.2191264 | 3.87E-07   |
| Neutrophil                       | MCPCOUNTER    | -0.405708  | 2.93E-22   |
| Endothelial cell                 | MCPCOUNTER    | -0.305794  | 7.55E-13   |
| Cancer associated fibroblast     | MCPCOUNTER    | 0.14393556 | 0.00093123 |
| Myeloid dendritic cell activated | XCELL         | 0.15716339 | 0.0002964  |
| B cell                           | XCELL         | 0.24469266 | 1.31E-08   |
| T cell CD4+ naive                | XCELL         | 0.11107104 | 0.01079668 |

|                                 |       |            |            |
|---------------------------------|-------|------------|------------|
| T cell CD4+ (non-regulatory)    | XCELL | -0.1219773 | 0.00508935 |
| T cell CD4+ central memory      | XCELL | 0.14904808 | 0.00060489 |
| T cell CD4+ effector memory     | XCELL | 0.12060827 | 0.00561167 |
| T cell CD8+                     | XCELL | 0.13751102 | 0.00157067 |
| T cell CD8+ central memory      | XCELL | 0.09230036 | 0.03431391 |
| T cell CD8+ effector memory     | XCELL | 0.14098965 | 0.00118665 |
| Class-switched memory B cell    | XCELL | 0.16428679 | 0.00015393 |
| Common lymphoid progenitor      | XCELL | -0.1733453 | 6.43E-05   |
| Endothelial cell                | XCELL | -0.2411996 | 2.12E-08   |
| Eosinophil                      | XCELL | -0.0972864 | 0.02566657 |
| Granulocyte-monocyte progenitor | XCELL | -0.1789821 | 3.65E-05   |
| Hematopoietic stem cell         | XCELL | -0.34388   | 4.78E-16   |
| Macrophage M1                   | XCELL | 0.16335175 | 0.00016801 |
| Monocyte                        | XCELL | 0.14106623 | 0.00117926 |
| B cell naive                    | XCELL | 0.14457396 | 0.00088305 |
| T cell NK                       | XCELL | 0.40857774 | 1.39E-22   |
| Plasmacytoid dendritic cell     | XCELL | 0.16634154 | 0.00012677 |
| B cell plasma                   | XCELL | 0.23760305 | 3.48E-08   |
| T cell CD4+ Th1                 | XCELL | 0.3077537  | 5.30E-13   |

|                              |       |            |            |
|------------------------------|-------|------------|------------|
| T cell CD4+ Th2              | XCELL | 0.15915894 | 0.00024737 |
| immune score                 | XCELL | 0.20962918 | 1.23E-06   |
| stroma score                 | XCELL | -0.1600294 | 0.00022846 |
| microenvironment score       | XCELL | 0.12805948 | 0.00325953 |
| B cell                       | EPIC  | -0.1511902 | 0.00050278 |
| Cancer associated fibroblast | EPIC  | 0.14355903 | 0.00096078 |
| T cell CD4+                  | EPIC  | -0.2689344 | 3.63E-10   |
| T cell CD8+                  | EPIC  | -0.1924836 | 8.76E-06   |
| Endothelial cell             | EPIC  | -0.3531751 | 6.75E-17   |
| Macrophage                   | EPIC  | 0.15131515 | 0.00049735 |
| NK cell                      | EPIC  | 0.21773541 | 4.60E-07   |

Table S3. The p value of comparing chemotherapeutics sensitivity and risk score.

| Drug       | p-value |
|------------|---------|
| Cisplatin  | 0.01    |
| Gefitinib  | 0.022   |
| KU.55933   | 1.1e-9  |
| Paclitaxel | 2.6e-9  |
| Sorafenib  | 0.74    |

|           |         |
|-----------|---------|
| Sunitinib | 2.7e-11 |
|-----------|---------|
